# Supplementary material
Source: PubMed Central journal article supplement (PMC4028203)
Supplement: NIHMS57819-supplement-1.pdf [file NIHMS57819-supplement-1.pdf]

Supplementary Data

Figure S1. *KIR AA* decreases in frequency and *KIR2DS1* increases in frequency across the birth weight groups from low to high birth weight in both UK and Norwegian populations.

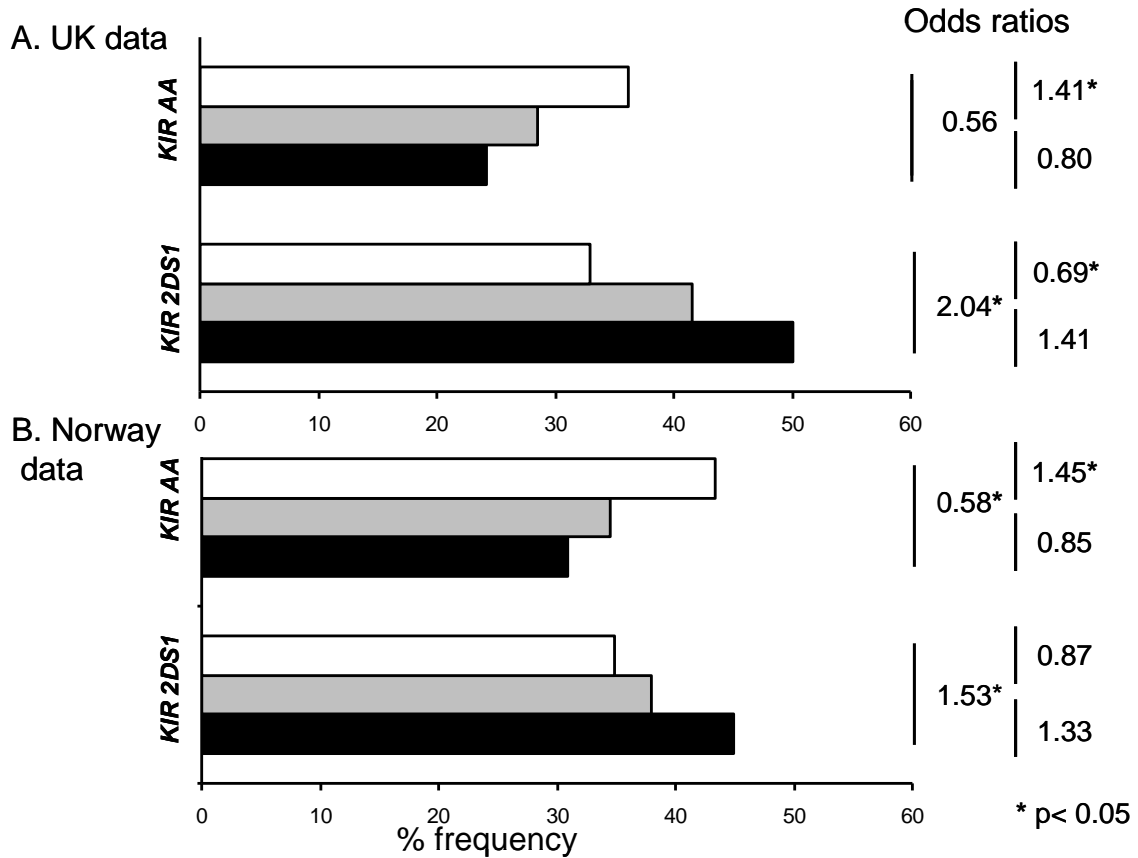

- Low birth weight ≤5<sup>th</sup> centile + pre-eclampsia  
 UK n=860, Norway n=224
- Median birth weight 6<sup>th</sup> to 89<sup>th</sup> centile  
 UK n=338, Norway n=656
- High birth weight ≥90<sup>th</sup> centile  
 UK n= 66, Norway n=256

**Table S1. *KIR* carrier frequencies in the Norwegian MoBa cohort.**

| <b>Maternal <i>KIR</i></b>     | <b>LBW+PE</b> | <b>Median</b>  | <b>HBW</b>    |
|--------------------------------|---------------|----------------|---------------|
| No                             | 224(83+141)   | 656            | 256           |
| <b>A haplotype <i>KIR</i>:</b> |               |                |               |
| <i>2DL1</i>                    | 96.9(217)     | 97.3(638)      | 97.7(250)     |
| <i>2DP1</i>                    | 97.3(218)     | 97.6(640)      | 98.0(251)     |
| <i>2DL3</i>                    | 92.0(206)     | 90.5(594)      | 91.8(235)     |
| <i>3DL1</i>                    | 96.4(216)     | 95.9(629)      | 95.3(244)     |
| <i>2DS4</i>                    | 96.4(216)     | 95.7(628)      | 95.3(244)     |
| <i>Del</i>                     | 51.8(116)     | 54.4(357)      | 54.7(140)     |
| <i>Del/Wt</i>                  | 28.6(64)      | 24.5(161)      | 21.9(56)      |
| <i>Wt</i>                      | 16.1(36)      | 16.9(111)      | 18.8(48)      |
| <b>B haplotype <i>KIR</i>:</b> |               |                |               |
| <i>2DS2</i>                    | 42.0(94)      | 47.0(308)      | 46.9(120)     |
| <i>2DL2</i>                    | 42.0(94)      | 47.0(308)      | 46.5(119)     |
| <i>2DS3</i>                    | 22.8(51)      | 26.8(176)      | 26.2 (67)     |
| <i>2DL5</i>                    | 40.6(91)      | 48.5(318)      | 51.2(131)*    |
| <i>3DS1</i>                    | 34.4(77)      | 38.6(253)      | 44.5(114)*    |
| <i>2DS5</i>                    | 26.8(60)      | 30.0(197)      | 36.3(93)*     |
| <i>2DS1</i>                    | 34.8(78)      | 38.0(249)      | 44.9(115)*    |
| <i>KIR AA</i>                  | 43.3(97)      | 34.5(226)      | 30.9(79)*     |
| Maternal <i>HLA-C2</i>         | 59.6(134/225) | 53.4(350)      | 59.0(151)     |
| Carriers                       |               |                |               |
| Fetal <i>HLA-C2</i>            | 55.0(122/222) | 54.8 (358/653) | 61.7(156/253) |
| carriers                       |               |                |               |

LBW = low birth weight  $\leq$ 5th centile; PE = pre-eclampsia; median = 6th to 89th centile, HBW = high birth weight  $\geq$ 90th centile.

\* Frequency of *B* haplotype *KIR* in the high birth weight group were significantly greater than in low birth weight plus pre-eclampsia group.

**Table S2. Effect of *KIR2DS5* and *KIR AA* on birth weight \***

| <i>KIR</i><br>tested | Subjects | Covariates       | Effect on birth weight (g) |      |    |      |
|----------------------|----------|------------------|----------------------------|------|----|------|
|                      |          |                  | n                          | mean | SE | p    |
| <b>2DS5</b>          | UK and   | Cohort and fetal |                            |      |    |      |
|                      | Norway   | sex              | 1316                       | 81   | 35 | 0.02 |
| <b>KIRAA</b>         | UK and   | Cohort and fetal |                            |      |    |      |
|                      | Norway   | sex              | 1316                       | -56  | 35 | 0.11 |

\* Presence versus absence of maternal *KIR2DS5* and *KIR AA* were tested for an effect on birth weight as a continuous variable in grams, in linear regression analyses of pregnancies >5th birth weight centile. Cohort and sex of the baby were included as covariates in every analysis. n = number of pregnancies analysed, mean = the average increase in birth weight (in grams) conferred by presence of the test variable and SE = standard error.
